# Supplementary material
Source: PubMed Central journal article supplement (PMC5129731)
Supplement: supp_pp.16.01520_PP2016-01520DR1_Supplemental_Materialfig1.pdf [file supp_pp.16.01520_PP2016-01520DR1_Supplemental_Materialfig1.pdf]

# Figure S1

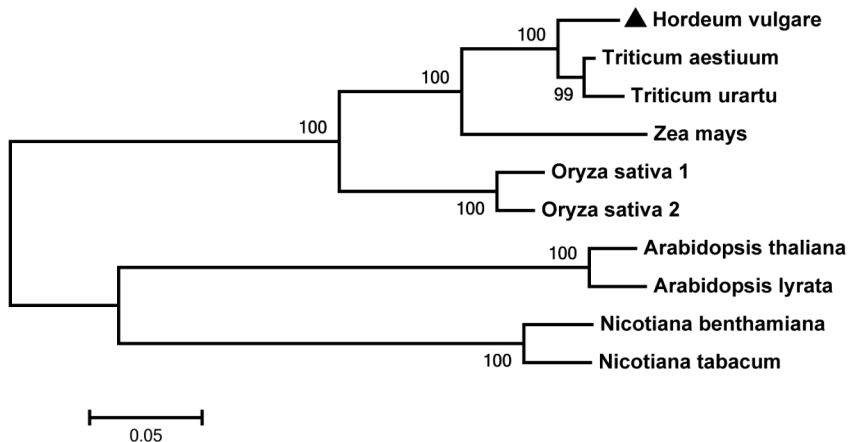

## Species

## Accession number

|                       |                              |
|-----------------------|------------------------------|
| Hordeum vulgare       | Hv: MLOC_54598.2             |
| Triticum aestivum     | Ta: gj669027747              |
| Triticum urartu       | Tu: EMS59099.1               |
| Zea mays              | Zma:GRMZM2G049672_P03        |
| Oryza sativa 1        | Osa:LOC_Os02g55200.2         |
| Oryza sativa 2        | Osa:LOC_Os01g01420.2         |
| Arabidopsis thaliana  | Ath: AT3G54360               |
| Arabidopsis lyrata    | Aly:485837                   |
| Nicotiana benthamiana | Nb: Niben101Scf02793g17007.1 |
| Nicotiana tabacum     | Nt: XP_016464833.1           |

**Figure S1.** Phylogenetic relationship of MIR1 and its homologs. The phylogenetic analysis was performed using the neighbor-joining method in MEGA6 and the number of bootstrap replications was set to 1000. The homologous proteins were searched from Phytozome program, NCBI and Sol Genomics Network. The bar indicates 5% dissimilarity. Species and accession number used in this study are shown under the phylogenetic tree.
