# Supplementary material
Source: PubMed Central journal article supplement (PMC5129731)
Supplement: supp_pp.16.01520_PP2016-01520DR1_Supplemental_Materialfig2.pdf [file supp_pp.16.01520_PP2016-01520DR1_Supplemental_Materialfig2.pdf]

**Figure S2**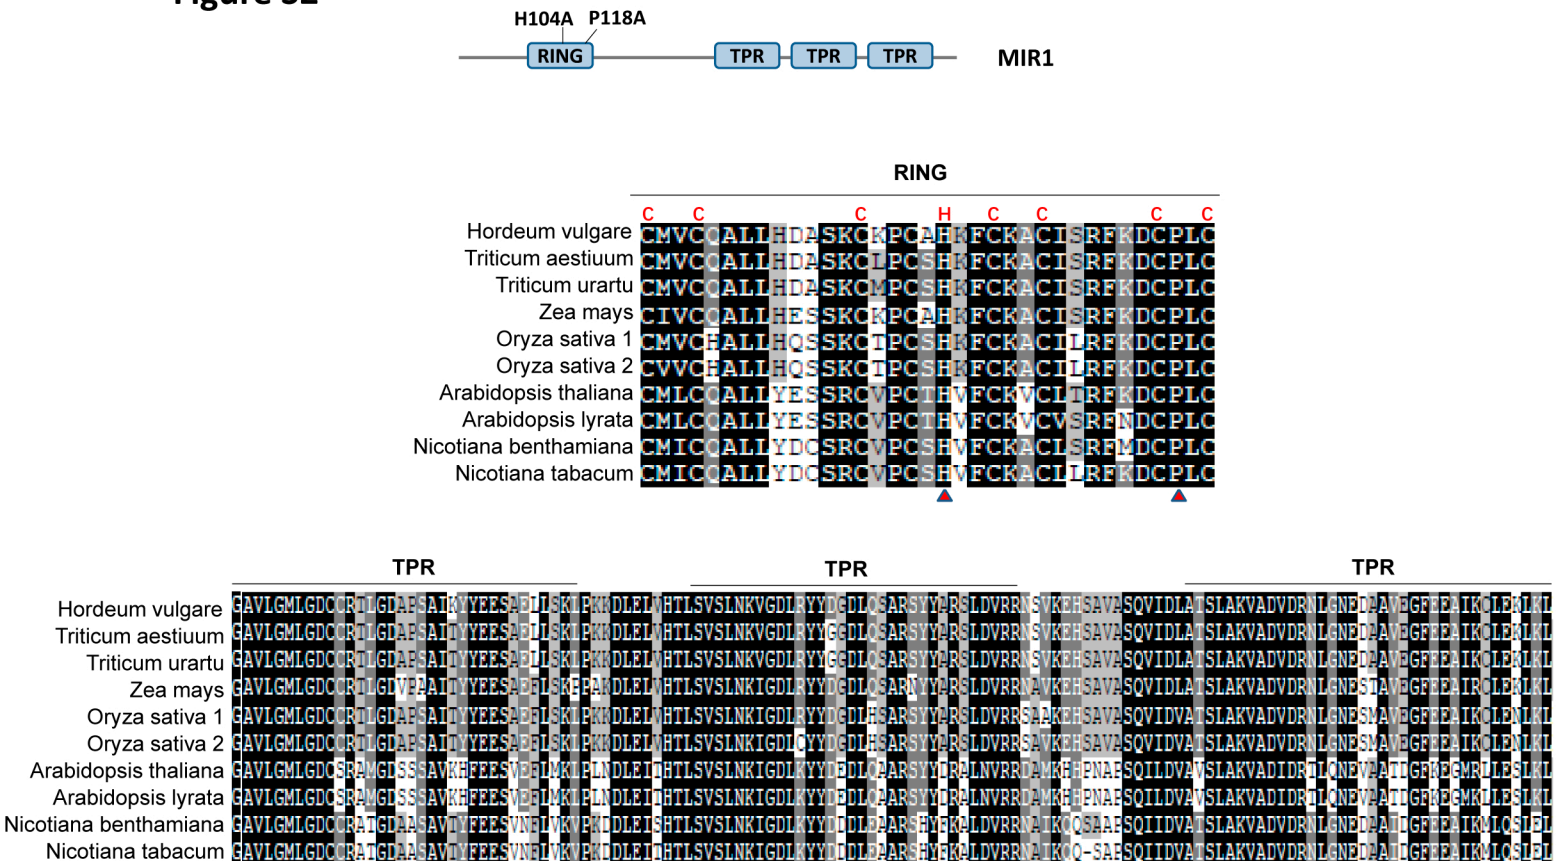

**Figure S2.** Sequence alignment of MIR1 and its homologs. The sequence alignment was performed using MegAlign of Lasergene and edited with Genedoc. All the homologs contain the C3HC4-type RING finger in the N-terminus and TPR repeats domain in the C-terminus. The conserved Cys (C) and His (H) in the RING finger are indicated; Triangle marks the H104 and P118 that are mutated to alanine (A) in this study. Schematic diagram shown above the alignment is the MIR1 domain structure and the relative position of RING and TPR domain.
