# Supplementary material
Source: PubMed Central journal article supplement (PMC5129731)
Supplement: supp_pp.16.01520_PP2016-01520DR1_Supplemental_Materialfig4.pdf [file supp_pp.16.01520_PP2016-01520DR1_Supplemental_Materialfig4.pdf]

# Figure S4

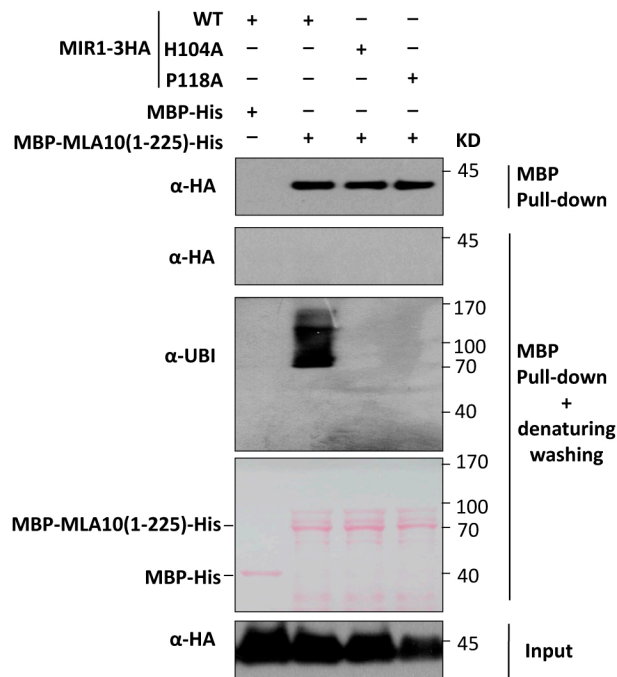

**Figure S4.** MIR1 can ubiquitinate MLA10 N-terminus. MIR1-3HA fusions were expressed in *N. benthamiana* by *Agro*-infiltration and MBP-MLA10(1-225)-His was obtained from *E. coli*. Crude extract of *N. benthamiana* was incubated with MBP-MLA10(1-225)-His protein before mixed with Ni-NTA beads for His pull-down. Above mixtures were subjected to pull-down and then for immunoblotting of MIR1-3HA fusions (1st panel), or for further washing with denaturing washing buffer and then immunoblot analysis of MIR1-3HA (2nd panel) and ubiquitinated MBP-MLA10(1-225)-His, respectively (3rd panel).
