# Supplementary material
Source: PubMed Central journal article supplement (PMC5129731)
Supplement: supp_pp.16.01520_PP2016-01520DR1_Supplemental_Materialfig5.pdf [file supp_pp.16.01520_PP2016-01520DR1_Supplemental_Materialfig5.pdf]

# Figure S5

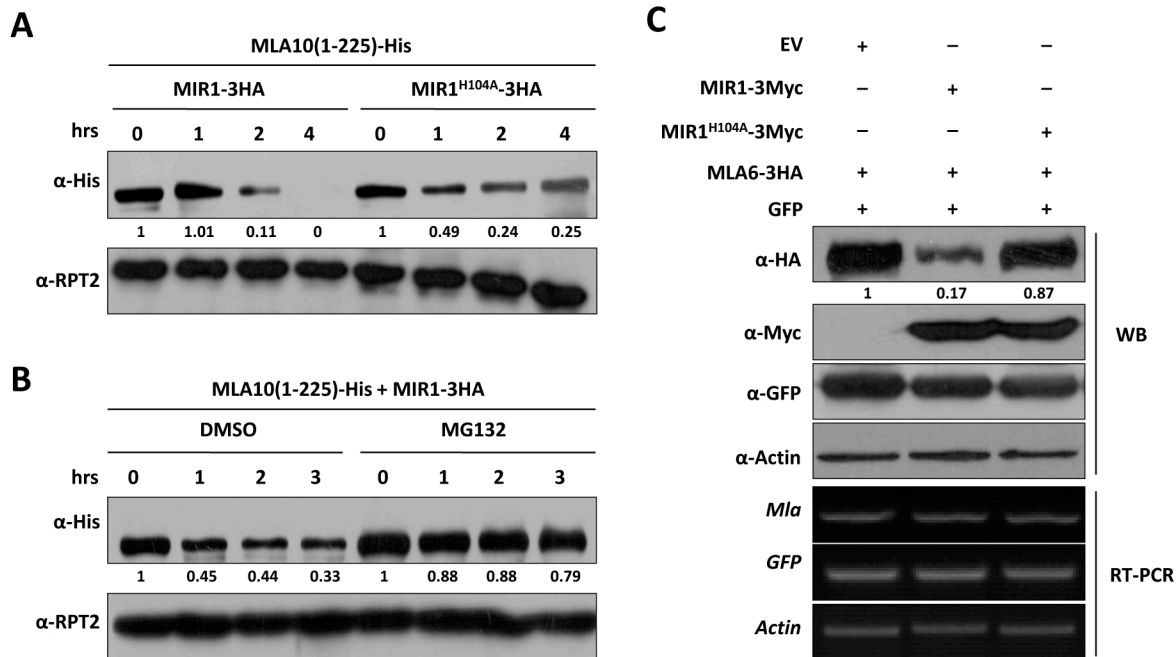

**Figure S5.** MIR1 promotes proteasomal degradation of MLAs. (A, B) MLA10(1-225)-His derived from *E. coli* was incubated with *N. benthamiana* crude extracts expressing MIR1-3HA or MIR1<sup>H104A</sup>-3HA fusion (A); or (B) additionally treated with DMSO (left half) or MG132 (right half) for indicated time (hrs). Immunoblot analysis shows protein level of MLA10(1-225) and RPT2, a 26S proteasome subunit used as a loading control. (C) MIR1 expression reduces MLA6 protein level in *N. benthamiana*. Indicated MIR1-3Myc fusion was co-expressed with MLA6-3HA or GFP in *N. benthamiana* by *Agro*-infiltration. Crude extracts obtained from leaf tissues at 60 hpi were subjected to immunoblot analysis of MLA1 protein level (1st panel). RT-PCR analysis shows equal expression of *Mla1*, *GFP* and *Actin* (Lower panels) in this assay. GFP was used as infiltration efficiency indicator and actin as a loading control.
