# Supplementary material
Source: PubMed Central journal article supplement (PMC5129731)
Supplement: supp_pp.16.01520_PP2016-01520DR1_Supplemental_Materialfig6.pdf [file supp_pp.16.01520_PP2016-01520DR1_Supplemental_Materialfig6.pdf]

# Figure S6

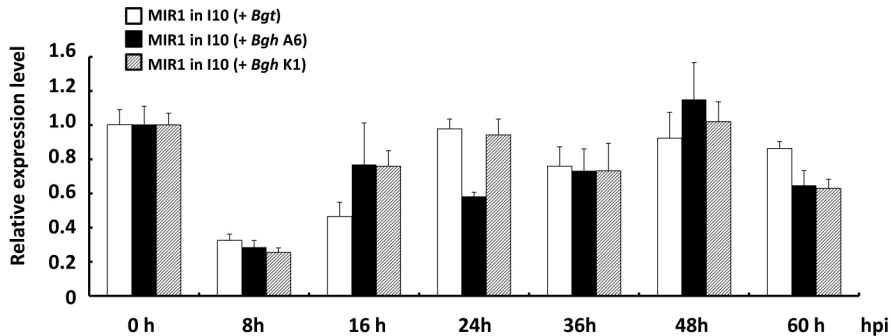

**Figure S6.** Transcript profiling of *MIR1* gene in barley. The *MIR1* transcripts were analyzed by qRT-PCR. Seedling leaves of barley near-isogenic line I10 (containing *Mla6*) were inoculated with *Blumeria graminis* f. sp. *tritici* (*Bgt*), *Bgh* A6 (incompatible isolate) or *Bgh* K1 (compatible isolate). The non-inoculated barley leaves were used as the control to eliminate background differences. *HvActin* was used as the internal control. Error bar indicates  $\pm$ SE of technical triplicates. Experiments were repeated at least three times with similar results.
